# Supplementary material
Source: publisher figshare collection journal article supplement (https://acs.figshare.com/ndownloader/files/22693742)
Supplement: Supplementary file 1 [file 22693742]

## Supporting Information

### Modeling Morphology and Catalytic Activity of Nanoparticle Ensembles Under Reaction Conditions

*Raffaele Cheula<sup>[a][b]</sup>, Matteo Maestri<sup>\*[a]</sup> and Giannis Mpourmpakis<sup>\*\*[b]</sup>*

<sup>[a]</sup> *Laboratory of Catalysis and Catalytic Processes, Dipartimento di Energia, Politecnico di Milano, Via La Masa, 34, 20156, Milano, Italy.*

<sup>[b]</sup> *Department of Chemical and Petroleum Engineering, University of Pittsburgh, 4200 Fifth Avenue, 15260, Pittsburgh, PA, USA.*

*\* email: [matteo.maestri@polimi.it](mailto:matteo.maestri@polimi.it)*

*\*\* email: [gmpourmp@pitt.edu](mailto:gmpourmp@pitt.edu)*

#### Table of Contents

Section 1: Creation of the ensemble of nanoparticles.

Section 2: Model for Gibbs free energy of formation of Rh nanoparticles in the presence of CO.

Section 3: Identification of active sites and calculation of reaction rates of CO\* dissociation.

## Section 1: Creation of the ensemble of nanoparticles.

Single-crystal fcc nanoparticles are created cutting the bulk phase with 8 Miller-index planes: (100), (110), (111), (210), (211), (311), (321), (331). The construction is centered on each symmetry points of the irreducible Brillouin zone.

Each of the 5 subsections of decahedral nanoparticles are cut with 5 different planes: (111) is the plane which cut the top and bottom surfaces of the particle creating (111)-like surfaces, (111)', (100) and (311) cut the lateral surfaces and (111)'' creates the hole at the top and bottom of the particle.

Each of the 20 subsection of icosahedra nanoparticles are cut with 3 planes: (111), (211) and (311), which create islands (and low-symmetry peninsulas) of atoms on (111)-like surfaces with different dimensions.

The number of nanoparticles created depends on the size of the initial ensemble of shapes, which is controlled by the number of planes chosen and the threshold value for the difference in distance between the planes. Moreover, it depends on the number of atoms removed in each iteration of the second step of the procedure. It is necessary to assess whether the number of nanoparticles of the ensemble is high enough to represent a large diversity of shapes. To this aim, we increase the maximum distance between different planes and the number of atoms removed in each iteration of step two of the procedure and we repeat the whole analysis, finding negligible variations in the final results.

The library of scripts employed in this work is available at the Github page:

[github.com/raffaelecheula/nanoparticles\\_ensembles](https://github.com/raffaelecheula/nanoparticles_ensembles).

## Section 2: Model for Gibbs free energy of formation of Rh nanoparticles in the presence of CO.

The cohesive energy of bulk Rh is calculated as difference between the DFT energy of one Rh atom in the fcc crystal cell and the DFT energy of a single Rh atom in vacuum:

$$E_{\text{coh}}^{\text{bulk}} = E_{\text{DFT}}^{\text{bulk}} / N_{\text{Rh}}^{\text{bulk}} - E_{\text{DFT}}^{\text{gas}} \quad (\text{S1})$$

where  $N_{\text{Rh}}^{\text{bulk}}$  is the number of atoms in the crystal cell of the bulk structure. The calculated Rh bulk cohesive energy is -6.150 eV/atom. The relaxation energy ( $E_{\text{relax}}$ ) as function of the coordination number is calculated by fitting DFT relaxation energies with the formula proposed by Chang et al.<sup>1</sup>. The DFT relaxation energies are obtained by periodic slab calculations. For each slab, first all the atoms are held fixed at distances of the fcc bulk. Then, one atom with the desired coordination number is allowed to relax. The difference in energy between the first and the second structure gives the relaxation energy for the considered coordination number. The slabs employed for the study are: Rh(100) for  $\text{CN}_8$ , Rh(110) for  $\text{CN}_7$  and  $\text{CN}_{11}$ , Rh(111) for  $\text{CN}_9$ , Rh(210) for  $\text{CN}_6$  and  $\text{CN}_{10}$ , Rh(111) with one Rh atom in the fcc site for  $\text{CN}_3$ , Rh(100) with one and two Rh atoms in the hollow site for  $\text{CN}_4$  and  $\text{CN}_5$ , respectively. The formula proposed by Chang et al.<sup>1</sup> has only one parameter, which for Rh slabs resulted equal to 2.68:

$$E_{\text{relax},i}(\text{CN}_i) = \frac{E_{\text{coh}}^{\text{bulk}}}{12} \left\{ \frac{2}{1 + \exp\left[\frac{(12 - \text{CN}_i)}{8 \text{CN}_i}\right]} \right\}^{-2.68} \quad (\text{S2})$$

In Figure S1 are reported the DFT relaxation energies (cross-points) and the fitted equation (dotted line).

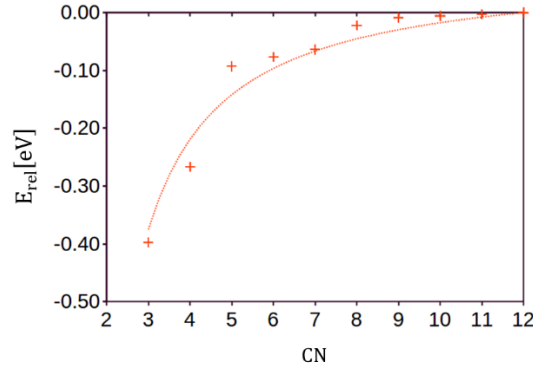

**Figure S1:** DFT relaxation energies (pluses) and fitted equation proposed by Chang et al.<sup>1</sup> (dotted line).

The strain energy density,  $W_{\text{strain}}$  inside multiply-twinned particles (MTP) is calculated as function of the shear modulus,  $\mu$ , and the Poisson's ratio,  $\nu$ , with the formulas reported by Howie and Marks<sup>2</sup>. Indeed, for the decahedra structures we have:

$$W_{\text{strain}}^{\text{dec}} = 1.05 \cdot 10^{-4} \mu / (1 - \nu) \quad (\text{S3})$$

And for icosahedra structures:

$$W_{\text{strain}}^{\text{ico}} = 8.41 \cdot 10^{-4} \mu (1 + \nu) / (1 - \nu) \quad (\text{S4})$$

The calculated shear modulus for bulk Rh is 151 GPa, the Poisson's ratio is 0.26. The strain energy per atom ( $E_{\text{strain}}$ ) is obtained by multiplying the strain energy density and the volume of one atom in the fcc bulk,  $v_{\text{atom}}$ :

$$E_{\text{strain}} = W_{\text{strain}} v_{\text{atom}} \quad (\text{S5})$$

The twin boundary energy of MTPs,  $E_{\text{twin}}$ , is calculated with a supercell characterized by an inversion of the bulk symmetry along the (111) direction, represented in Figure S2. The cell contains two symmetric planes, therefore the twin boundary energy per atom is calculated as:

$$E_{\text{twin}} = \frac{1}{2} [E_{\text{DFT}}^{\text{slab}} - 6 E_{\text{DFT}}^{\text{bulk}}] \quad (\text{S6})$$

For Rh we obtain a value of  $E_{\text{twin}}$  of 0.0081 eV/atom.

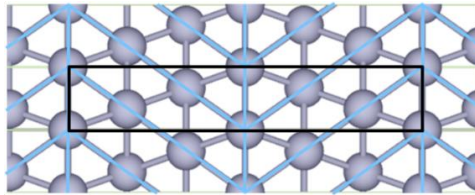

**Figure S2:** Supercell for calculating the twin boundary energy along the (111) direction. In black is enlightened the cell.

The binding energy of CO at zero coverage ( $E_{\text{bind},i}^{0,\text{CO}^*}$ ) is investigated with calculations on the following slab supercells: Rh(100), Rh(110), Rh(111), Rh(210), Rh(211), Rh(311), Rh(321), Rh(331). Moreover, to study adsorption on low coordinated Rh atoms we employ: a Rh(100) slab with one Rh atom in the hollow site ( $\text{CN}_4$ ), a Rh(111) slab with one Rh atom (with  $\text{CN}_3$ ) and three Rh atoms (with  $\text{CN}_5$ ) in the fcc sites. Interestingly, for coordination numbers lower than 5,  $\text{CO}^*$  molecules do not adsorb perpendicular to the slabs but tilted. The binding energy at zero coverage is then corrected with the correlation proposed by Mason et al.<sup>3</sup>, with the following formula:

$$\Delta E(v_{\text{CO}}) = 0.45 - \frac{0.4}{2100 - 1600} (v_{\text{CO}} - 1600) \quad (\text{S7})$$

where  $\Delta E$  is the correction applied to correct the CO binding energy and  $\nu_{\text{CO}}$  is the frequency of the CO stretching. As represented in Figure S3, the correction energy differs relevantly for different adsorption sites.

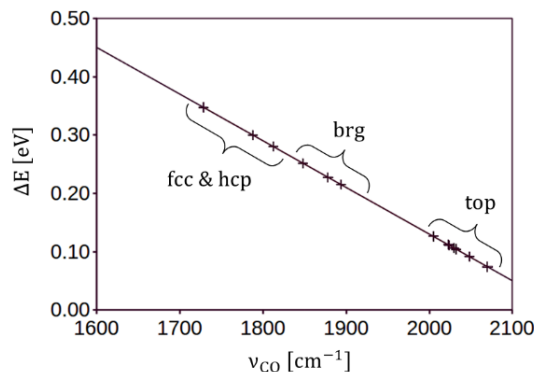

**Figure S3:** Plot of correction applied to the CO binding energy, function of the CO stretching frequency, according to Mason et al.<sup>3</sup>. With pluses are indicated CO frequencies and corresponding energy corrections for the adsorption sites considered in the work.

A linear correlation between the binding energy at zero coverage (on the top sites)  $E_{\text{bind},i}^{0,\text{CO}^*}$  and the coordination number (represented in Figure S4) is found:

$$E_{\text{bind},i}^{0,\text{CO}^*}(\text{CN}_i) = -1.836 + 3.494 \cdot 10^{-2} \text{CN}_i \quad (\text{S8})$$

Then, the correlation is tested in representing the binding energy on surface atoms of nanoclusters. For clusters with number of atoms higher than 80, the correlation works well. In particular, we test the adsorption of  $\text{CO}^*$  on 3 sites (with  $\text{CN}_3$ ,  $\text{CN}_6$  and  $\text{CN}_7$ ) of  $\text{Rh}_{87}$  and 4 sites (with  $\text{CN}_5$ ,  $\text{CN}_7$ ,  $\text{CN}_8$  and  $\text{CN}_9$ ) of  $\text{Rh}_{147}$ . As represented in Figure S4, we found errors lower than 0.07 eV/ $\text{CO}^*$ .

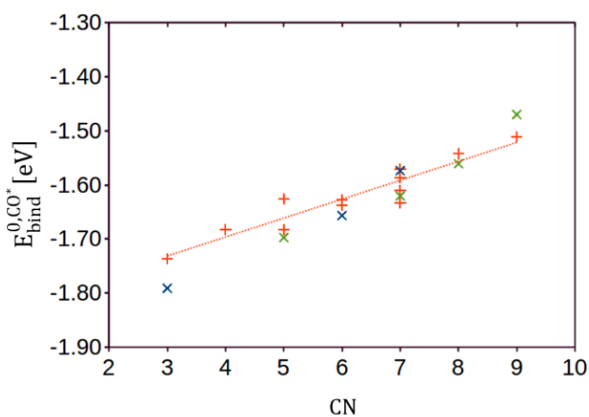

**Figure S4:** Binding energy of CO as function of the coordination number of the Rh atom at which it is bonded (on the top site). With red pluses are reported the data obtained on periodic surfaces; with crosses are indicated the data obtained on nanoparticles ( $\text{Rh}_{87}$  in green,  $\text{Rh}_{147}$  in blue).

The adsorbate-adsorbate interaction,  $\Delta E_{\text{bind}}^{\text{CO}^*}$ , is investigated calculating the binding energy at different coverages on 8 Rh crystal facets: Rh(100), Rh(110), Rh(111), Rh(210), Rh(211), Rh(311), Rh(321), Rh(331). We observed that when  $\text{CO}^*$  interacts with neighbor molecules, they relax their positions and tilt the adsorption angle to maximize their distances (maintaining almost the same bond length with the Rh atoms). On all the investigated crystal facets, the relaxed structures at high  $\text{CO}^*$  coverage present similar distorted centered-hexagonal patterns, represented in Figure S5.

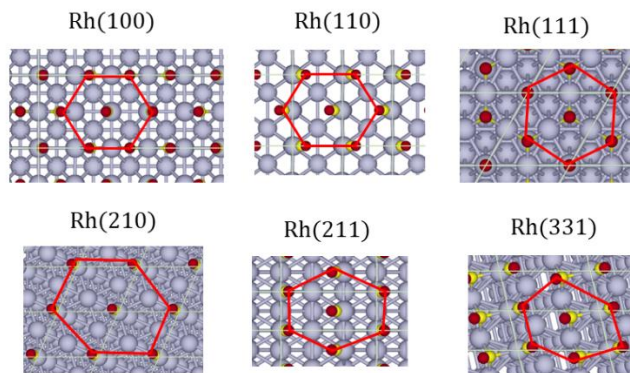

**Figure S5:** high CO\* coverage structures on 6 different crystal facets of Rh. In red are enlightened the distorted centered-hexagonal patterns.

As the adsorbed CO\* tend to occupy all the available surface area of the crystal facets, we investigate how their binding energy changes with respect to the ratio between the number of adsorbed CO\* molecules ( $N_{\text{CO}^*}$ ) and the total surface area available for adsorption ( $S_{\text{tot}}$ ). We find a good correlation between  $\Delta E_{\text{bind}}^{\text{CO}^*}$  and  $N_{\text{CO}^*}/S_{\text{tot}}$  and we use a power law to describe it:

$$\Delta E_{\text{bind}}^{\text{CO}^*}(N_{\text{CO}^*}/S_{\text{tot}}) = 3.034 \cdot 10^{+2} (N_{\text{CO}^*}/S_{\text{tot}})^{3.31} \quad (\text{S9})$$

The two parameters of the power law are fitted on periodic slab calculations (pluses in Figure S6). Then, the correlation is tested on nanocluster at high coverage (crosses in Figure S6). For nanocluster and nanoparticles,  $S_{\text{tot}}$  is calculated with the following procedure. First, we create a convex hull connecting all the surface atoms (with coordination number lower than 12) and we draw a 3D surface which contains all of them. Then, we enlarge such surface by increasing the distance of each of its point by the average bond length of CO\* on Rh facets and we calculate the area of the resulting surface.

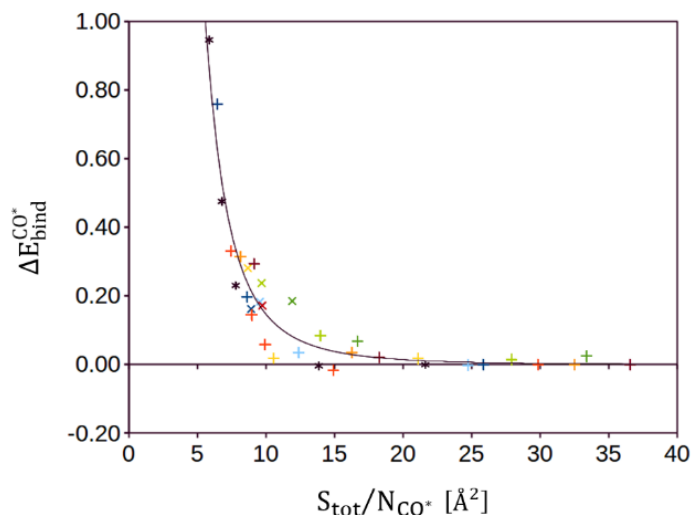

**Figure S6:** Binding energy difference induced by lateral interaction as function of the average area available to CO\* molecules on Rh slabs (pluses) and nanocluster (crosses). With stars are reported the values of CO molecules in vacuum, obtained with hexagonal unit cells with a height of 12 Å.

The contribution of vibrational and translational free energy of adsorbed CO\* molecules to the binding, ( $\Delta G_i^{\text{CO}^*}$ ) is calculated with slab models at low coverage and the hindered translator model<sup>4</sup>. An average diffusion barrier of CO\* molecules (0.12 eV) is employed in the analysis. For each surface slab,  $\Delta G_i^{\text{CO}^*}$  is evaluated with the following procedure. First, we calculate

the vibrational modes and the corresponding vibrational free energy of the first layer of the clean slab. Then, we calculate the vibrational and translational free energy of the slab with adsorbed CO\*, evaluating the vibrational modes of the adsorbate along with the first layer of Rh atoms.  $\Delta G_i^{\text{CO}^*}$  is obtained as difference between the vibrational and translational free energy of the slab with the adsorbed CO\* and the vibrational free energy of the clean slab. As for the binding energy at zero coverage, we find a good correlation between  $\Delta G_i^{\text{CO}^*}$  and the coordination number of the Rh atom at which CO\* is bonded. For the system at 823 K, the correlation obtained (represented in Figure S7.a) is the following:

$$\Delta G_i^{\text{CO}^*}(\text{CN}_i) = -0.869 + 2.770 \cdot 10^{-2} \text{CN}_i \quad (\text{S10})$$

The Gibbs binding energy as a function of the coordination number is then calculated with Equation (7). As an example, for the system at 823 K and  $P_{\text{CO}} = 1 \text{ atm}$  ( $\Delta \mu_{\text{gas}}^{\text{CO}} = -1.8 \text{ eV}$ ), we obtain the following correlation (represented in Figure S7.b):

$$G_{\text{bind},i}^{\text{CO}^*}(\text{CN}_i) = -1.124 + 6.276 \cdot 10^{-2} \text{CN}_i \quad (\text{S11})$$

The chemical potential of CO in the gas phase,  $\Delta \mu_{\text{gas}}^{\text{CO}}$ , is calculated in the ideal gas approximation:

$$\Delta \mu_{\text{gas}}^{\text{CO}}(T, P_{\text{CO}}) = \Delta \mu_{\text{gas}}^{0,\text{CO}}(T) + k_B T \ln(P_{\text{CO}}/P_0) \quad (\text{S12})$$

where  $\Delta \mu_{\text{gas}}^{0,\text{CO}}$  is obtained from NASA coefficients<sup>5</sup>, and  $P_0$  is the reference pressure, equal to 1 atm.

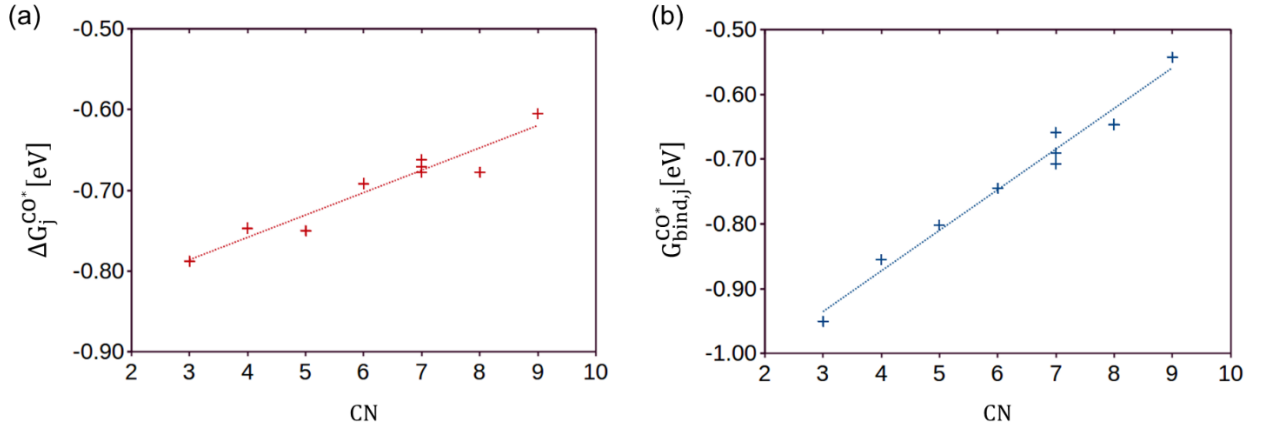

**Figure S7:** (a) Contribution of vibrational and translational free energy of adsorbed CO\* molecules to the binding ( $\Delta G_i^{\text{CO}^*}$ ) at 823 K, as a function of the coordination number of the Rh atom where CO is bonded (on the top site). (b) Gibbs free energy of CO binding (at 823 K and  $P_{\text{CO}} = 1 \text{ atm}$ ) as a function of the coordination number. The data are obtained on periodic surfaces.

The diffusion barriers required by the hindered translator model<sup>4</sup> are obtained through Climbing-Image Nudged Elastic Band (CI-NEB) calculations, in which the CO\* adsorbates move from a preferred adsorption site to a neighbor one (top sites). We calculate the diffusion barriers on Rh(100), Rh(110), Rh(111), Rh(311), Rh(331) and Rh(210) facets and we find that the barriers are similar on all these different facets. Their values range from 0.10 eV to 0.15 eV. The data are shown in Figure S8. Since we did not find any trend between the diffusion barriers and the coordination numbers of the facets, we used an averaged value in our analysis (0.12 eV).

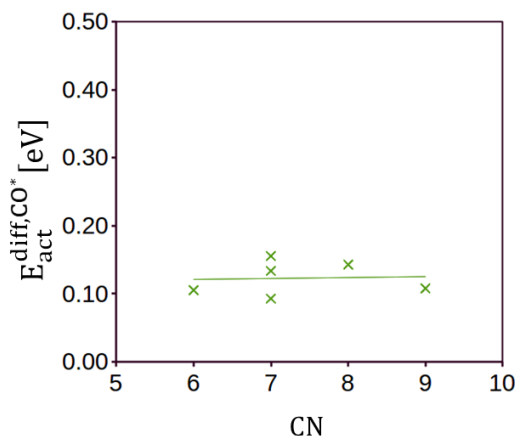

**Figure S8:** Activation energies of CO\* surface diffusion as a function of the coordination number of the Rh atom where CO is bonded (on the top site). The data are obtained on periodic surfaces.

To assess the hindered translator model<sup>4</sup> is really necessary in our work, we calculate  $\Delta G_i^{CO^*}(CN_i)$  (the free energy of adsorbed CO using different vibrational entropy contributions) using the simpler harmonic oscillator model (at 823 K) and we compare it with  $\Delta G_i^{CO^*}(CN_i)$  obtained using the hindered translator model at the same temperature. The comparison is showed in Figure S9. The difference between the values calculated with the two models is about 0.05 eV per CO molecule (it is almost constant with the coordination number). At higher temperature, we expect this difference to increase, as the behavior of CO\* adsorbates approaches that of 2D ideal gases.

Regarding energy deviations, when we tested our model to reproduce the DFT formation energies (Figure 2), we calculated the error to be lower than 0.04 eV per Rh atom. When we compared the binding energies of the model (Equation S8) to our DFT calculations, the error of the model was lower than 0.07 eV per CO molecule, as reported in Figure S4. The difference in the free energies calculated with the harmonic approximation vs the hindered translator (0.05 eV per CO molecule) is of the same order as the errors of the model. As a result, both the accuracies of electronic energy and entropy are relevant for the evaluation of the Gibbs free energies of the nanoparticles in the presence of adsorbed CO.

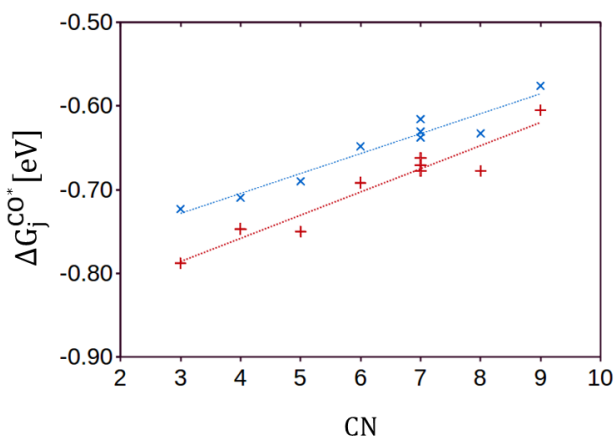

**Figure S9:** Contribution of vibrational and translational free energy of adsorbed CO\* molecules to the binding ( $\Delta G_i^{CO^*}$ ) at 823 K, as a function of the coordination number of the Rh atom where CO is bonded (on the top site), calculated with the hindered translator model (in red) and the harmonic oscillator model (in blue).

| slabs       |      |    |   |   |   |   |   |   |    |    |    |         |         |           |
|-------------|------|----|---|---|---|---|---|---|----|----|----|---------|---------|-----------|
| Structure   | N Rh | CN |   |   |   |   |   |   |    |    |    | E f DFT | E f MOD | Error MOD |
|             | [-]  | 3  | 4 | 5 | 6 | 7 | 8 | 9 | 10 | 11 | 12 | [eV/Rh] | [eV/Rh] | [%]       |
| Rh(100)     | 7    |    |   |   |   | 2 | 2 |   |    |    | 5  | 0.306   | 0.309   | 1.07%     |
| Rh(110)     | 10   |    |   |   |   |   |   |   |    | 2  | 6  | 0.307   | 0.328   | 6.80%     |
| Rh(111)     | 7    |    |   |   |   |   |   | 2 |    |    | 5  | 0.227   | 0.227   | -0.01%    |
| Rh(210)     | 16   |    |   |   | 2 |   |   | 2 |    | 2  | 10 | 0.320   | 0.344   | 7.39%     |
| Rh(211)     | 15   |    |   |   |   | 2 |   | 2 | 2  |    | 9  | 0.347   | 0.360   | 3.72%     |
| Rh(311)     | 10   |    |   |   |   | 2 |   |   | 2  |    | 6  | 0.364   | 0.381   | 4.7%      |
| Rh(321)     | 22   |    |   |   | 2 |   | 2 | 2 | 2  | 2  | 12 | 0.376   | 0.396   | 5.33%     |
| Rh(331)     | 15   |    |   |   |   | 2 |   |   | 2  | 2  | 9  | 0.308   | 0.325   | 5.54%     |
| Rh(111)+1Rh | 30   | 2  |   |   |   |   |   |   |    |    | 20 | 0.313   | 0.337   | 7.43%     |
| Rh(111)+2Rh | 46   |    | 4 |   |   |   |   |   | 6  | 2  | 30 | 0.310   | 0.343   | 10.47%    |
| Rh(111)+3Rh | 69   |    |   | 6 |   |   |   | 6 |    | 6  | 45 | 0.292   | 0.313   | 7.18%     |
| Rh(111)+4Rh | 71   |    |   | 4 | 4 |   |   | 2 | 10 | 4  | 47 | 0.302   | 0.321   | 5.97%     |
| Rh(111)+6Rh | 96   |    |   | 4 | 4 | 4 |   | 2 | 12 |    | 70 | 0.290   | 0.295   | 1.69%     |
| Rh(100)+1Rh | 30   |    | 2 |   |   |   |   | 8 |    |    | 20 | 0.346   | 0.370   | 9.10%     |
| Rh(210)+1Rh | 18   |    |   | 2 |   |   | 2 | 2 |    | 2  | 10 | 0.446   | 0.463   | 3.85%     |

| wires      |      |    |   |   |   |   |   |    |    |    |    |         |         |           |
|------------|------|----|---|---|---|---|---|----|----|----|----|---------|---------|-----------|
| Structure  | N Rh | CN |   |   |   |   |   |    |    |    |    | E f DFT | E f MOD | Error MOD |
|            | [-]  | 3  | 4 | 5 | 6 | 7 | 8 | 9  | 10 | 11 | 12 | [eV/Rh] | [eV/Rh] | [%]       |
| Rh WIR 030 | 30   |    |   |   |   | 6 | 2 | 8  |    |    | 14 | 0.565   | 0.561   | -0.58%    |
| Rh WIR 058 | 58   |    |   |   |   | 6 | 2 | 16 |    |    | 34 | 0.404   | 0.400   | -1.04%    |

| fcc nanoparticles |      |    |   |    |    |    |    |    |    |    |    |         |         |           |
|-------------------|------|----|---|----|----|----|----|----|----|----|----|---------|---------|-----------|
| Structure         | N Rh | CN |   |    |    |    |    |    |    |    |    | E f DFT | E f MOD | Error MOD |
|                   | [-]  | 3  | 4 | 5  | 6  | 7  | 8  | 9  | 10 | 11 | 12 | [eV/Rh] | [eV/Rh] | [%]       |
| Rh FCC 055        | 55   |    |   | 12 |    | 24 | 6  |    |    |    | 13 | 1.215   | 1.178   | -3.06%    |
| Rh FCC 075        | 75   | 4  |   | 20 |    |    | 33 |    |    |    | 18 | 1.170   | 1.164   | -0.54%    |
| Rh FCC 079        | 79   |    |   |    | 24 | 12 |    | 24 |    |    | 19 | 1.007   | 0.970   | -3.67%    |
| Rh FCC 087        | 87   | 8  |   |    | 24 | 12 |    |    | 24 |    | 19 | 1.049   | 1.053   | 0.37%     |
| Rh FCC 135        | 135  |    |   |    | 48 |    | 24 | 8  |    | 12 | 43 | 0.887   | 0.868   | -2.08%    |
| Rh FCC 140        | 140  |    |   |    | 26 | 24 |    | 48 |    |    | 42 | 0.820   | 0.827   | 0.75%     |
| Rh FCC 147        | 147  |    |   | 12 |    | 48 | 24 | 8  |    |    | 55 | 0.850   | 0.839   | -1.33%    |
| Rh FCC 157        | 157  |    | 4 |    | 28 | 28 | 16 | 16 | 2  | 12 | 51 | 0.823   | 0.829   | 0.79%     |
| Rh FCC 165        | 165  |    |   | 24 |    | 48 | 6  | 8  |    | 36 | 43 | 0.810   | 0.833   | 2.86%     |
| Rh FCC 225        | 225  |    |   | 24 | 24 | 36 | 6  |    | 48 |    | 87 | 0.754   | 0.760   | 0.86%     |
| Rh CUB 147        | 147  | 4  |   | 28 |    |    | 65 |    |    |    | 50 | 0.952   | 0.941   | -1.22%    |

| multiply twinned nanoparticles |      |    |   |    |    |    |    |    |    |    |     |         |         |           |
|--------------------------------|------|----|---|----|----|----|----|----|----|----|-----|---------|---------|-----------|
| Structure                      | N Rh | CN |   |    |    |    |    |    |    |    |     | E f DFT | E f MOD | Error MOD |
|                                | [-]  | 3  | 4 | 5  | 6  | 7  | 8  | 9  | 10 | 11 | 12  | [eV/Rh] | [eV/Rh] | [%]       |
| Rh DEC 055                     | 55   |    |   | 10 | 7  | 10 | 15 |    |    |    | 13  | 1.180   | 1.153   | -2.32%    |
| Rh DEC 127                     | 127  |    |   |    | 22 | 30 | 10 | 10 | 15 |    | 40  | 0.869   | 0.846   | -2.64%    |
| Rh DEC 136                     | 136  |    |   |    | 32 |    | 35 | 20 | 5  |    | 44  | 0.862   | 0.830   | -3.76%    |
| Rh DEC 146                     | 146  |    |   |    | 22 | 20 | 20 | 30 | 5  |    | 49  | 0.830   | 0.790   | -4.80%    |
| Rh DEC 147                     | 147  |    |   | 10 | 12 | 20 | 40 | 10 |    |    | 55  | 0.848   | 0.830   | -2.17%    |
| Rh DEC 247                     | 247  |    |   |    | 22 | 30 | 30 | 60 | 5  |    | 100 | 0.700   | 0.667   | -4.65%    |
| Rh ICO 055                     | 55   |    |   |    | 12 |    | 30 |    |    |    | 13  | 1.177   | 1.075   | -8.69%    |
| Rh ICO 092                     | 92   |    |   | 3  | 12 | 9  | 30 | 10 |    |    | 28  | 0.982   | 0.975   | -0.72%    |
| Rh ICO 147                     | 147  |    |   |    | 12 |    | 60 | 20 |    |    | 55  | 0.818   | 0.798   | -2.41%    |
| Rh ICO 184                     | 184  |    |   | 4  | 11 | 13 | 49 | 33 |    |    | 74  | 0.777   | 0.784   | 0.90%     |
| Rh ICO 309                     | 309  |    |   |    | 12 |    | 90 | 60 |    |    | 147 | 0.681   | 0.643   | -5.69%    |

**Table S1:** Table of the data set of clean slabs, wires and nanoparticles used and analyzed in the work. In the table are reported: the numbers of Rh atoms (N Rh); the distributions of coordination numbers (CN); the formation energies per Rh atom calculated with DFT (E f DFT) and with the model described in the work (E f MOD), Eq. (2); the percentage errors (Error MOD).

| slabs       |        |         |         |           |         |         |
|-------------|--------|---------|---------|-----------|---------|---------|
| Structure   | CN Rh* | E b DFT | E b MOD | Error MOD | E f DFT | E f MOD |
|             | [-]    | [eV/CO] | [eV/CO] | [eV/Rh]   | [eV/Rh] | [eV/Rh] |
| Rh(100)     | 8      | -1.536  | -1.556  | 1.35%     | 0.196   | 0.198   |
| Rh(110)     | 7      | -1.583  | -1.591  | 0.55%     | 0.228   | 0.248   |
| Rh(111)     | 9      | -1.511  | -1.522  | 0.70%     | 0.119   | 0.118   |
| Rh(210)     | 6      | -1.606  | -1.626  | 1.24%     | 0.220   | 0.242   |
| Rh(211)     | 7      | -1.632  | -1.591  | -2.47%    | 0.238   | 0.254   |
| Rh(311)     | 7      | -1.602  | -1.591  | -0.65%    | 0.203   | 0.222   |
| Rh(321)     | 6      | -1.617  | -1.626  | 0.59%     | 0.229   | 0.248   |
| Rh(331)     | 7      | -1.584  | -1.591  | 0.44%     | 0.202   | 0.218   |
| Rh(111)+1Rh | 3      | -1.672  | -1.731  | 3.56%     | 0.202   | 0.221   |
| Rh(111)+2Rh | 4      | -1.598  | -1.696  | 6.14%     | 0.241   | 0.269   |
| Rh(111)+3Rh | 5      | -1.594  | -1.661  | 4.25%     | 0.246   | 0.265   |
| Rh(111)+4Rh | 5      | -1.673  | -1.661  | -0.71%    | 0.255   | 0.274   |
| Rh(100)+1Rh | 4      | -1.679  | -1.696  | 1.02%     | 0.242   | 0.257   |
| Rh(210)+1Rh | 5      | -1.641  | -1.661  | 1.22%     | 0.280   | 0.279   |

  

| nanoparticles |        |         |         |           |         |         |
|---------------|--------|---------|---------|-----------|---------|---------|
| Structure     | CN Rh* | E b     | E b MOD | Error MOD | E f DFT | E f MOD |
|               | [-]    | [eV/CO] | [eV/CO] | [eV/Rh]   | [eV/Rh] | [eV/Rh] |
| Rh FCC 087    | 3      | -1.726  | -1.731  | 0.30%     | 1.028   | 1.033   |
|               | 6      | -1.636  | -1.626  | -0.59%    | 0.822   | 0.828   |
|               | 7      | -1.565  | -1.591  | 1.67%     | 0.832   | 0.833   |
| Rh FCC 147    | 5      | -1.687  | -1.661  | -1.54%    | 0.713   | 0.703   |
|               | 7      | -1.612  | -1.591  | -1.29%    | 0.588   | 0.579   |
|               | 8      | -1.555  | -1.556  | 0.13%     | 0.840   | 0.828   |
|               | 9      | -1.470  | -1.522  | 3.50%     | 0.771   | 0.756   |

**Table S2:** Table of the data set of CO adsorption at low coverage on slabs and nanoparticles. In the table are reported: the coordination numbers of the Rh atom at which CO is adsorbed (CN Rh\*); the binding energies calculated with DFT (E b DFT) and with the model illustrated in the work (E b MOD); the percentage errors (Error MOD); the formation energies of the systems with adsorbed CO\* at low coverage calculated with DFT (E f DFT) and with the model (E f MOD).



| slabs             |                      |                 |                   |                   |                    |                     |                      |                    |                      |                    |                    |
|-------------------|----------------------|-----------------|-------------------|-------------------|--------------------|---------------------|----------------------|--------------------|----------------------|--------------------|--------------------|
| Rh(100)           |                      |                 |                   |                   |                    |                     |                      |                    |                      |                    |                    |
| site              | CO stretch<br>[1/cm] | N CO top<br>[-] | N CO brg<br>[-]   | N CO hol<br>[-]   | E b DFT<br>[eV/CO] | CORR<br>[eV]        | E b CORR<br>[eV]     |                    |                      |                    |                    |
| top               | 2029.6               | 1               | 0                 | 0                 | -1.508             | -0.006              | -1.515               |                    |                      |                    |                    |
| brg               | 1878.1               | 0               | 1                 | 0                 | -1.589             | 0.109               | -1.480               |                    |                      |                    |                    |
| Structure         | Slot<br>[Å²]         | N CO top<br>[-] | N CO brg<br>[-]   | N CO hol<br>[-]   | E b DFT<br>[eV/CO] | E b CORR<br>[eV/CO] | Slot / N CO*<br>[Å²] | E b MOD<br>[eV/CO] | Error MOD<br>[eV/Rh] | E f DFT<br>[eV/Rh] | E f MOD<br>[eV/Rh] |
| clean             | 7.465                | 0               | 0                 | 0                 |                    |                     |                      |                    |                      | 0.306              | 0.309              |
| 0.25 ML top       | 29.859               | 1               | 0                 | 0                 | -1.508             | -1.515              | 29.859               | -1.553             | 2.48%                | 0.252              | 0.254              |
| 0.50 ML top       | 14.930               | 1               | 0                 | 0                 | -1.525             | -1.531              | 14.930               | -1.518             | -0.90%               | 0.197              | 0.201              |
| 0.75 ML Gurney    | 59.718               | 2               | 4                 | 0                 | -1.503             | -1.432              | 9.953                | -1.407             | -1.76%               | 0.153              | 0.159              |
| 0.83 ML Yong      | 89.577               | 4               | 6                 | 0                 | -1.412             | -1.349              | 8.958                | -1.345             | -0.36%               | 0.146              | 0.149              |
| 1.00 ML brg       | 14.930               | 0               | 2                 | 0                 | -1.258             | -1.149              | 7.465                | -1.169             | 1.72%                | 0.142              | 0.142              |
| Rh(110)           |                      |                 |                   |                   |                    |                     |                      |                    |                      |                    |                    |
| site              | CO stretch<br>[1/cm] | N CO top<br>[-] | N CO str<br>[-]   | N CO lbr<br>[-]   | E b DFT<br>[eV]    | CORR<br>[eV]        | E b CORR<br>[eV]     |                    |                      |                    |                    |
| top               | 2004.9               | 1               | 0                 | 0                 | -1.631             | 0.012               | -1.618               |                    |                      |                    |                    |
| str               | 1848.0               | 0               | 1                 | 0                 | -1.599             | 0.132               | -1.468               |                    |                      |                    |                    |
| Structure         | Slot<br>[Å²]         | N CO top<br>[-] | N CO str<br>[-]   | N CO lbr<br>[-]   | E b DFT<br>[eV/CO] | E b CORR<br>[eV/CO] | Slot / N CO*<br>[Å²] | E b MOD<br>[eV/CO] | Error MOD<br>[eV/Rh] | E f DFT<br>[eV/Rh] | E f MOD<br>[eV/Rh] |
| clean             | 10.557               | 0               | 0                 | 0                 |                    |                     |                      |                    |                      | 0.307              | 0.328              |
| 0.25 ML top       | 42.227               | 1               | 0                 | 0                 | -1.631             | -1.618              | 42.227               | -1.590             | -1.73%               | 0.262              | 0.284              |
| 0.50 ML top       | 21.114               | 1               | 0                 | 0                 | -1.613             | -1.601              | 21.114               | -1.579             | -1.35%               | 0.218              | 0.240              |
| 1.00 ML shift hol | 21.114               | 0               | 2                 | 0                 | -1.581             | -1.449              | 10.557               | -1.468             | 1.33%                | 0.146              | 0.165              |
| Rh(111)           |                      |                 |                   |                   |                    |                     |                      |                    |                      |                    |                    |
| site              | CO stretch<br>[1/cm] | N CO top<br>[-] | N CO fcc<br>[-]   | N CO hcp<br>[-]   | E b DFT<br>[eV]    | CORR<br>[eV]        | E b CORR<br>[eV]     |                    |                      |                    |                    |
| top               | 2048.2               | 1               | 0                 | 0                 | -1.478             | -0.021              | -1.499               |                    |                      |                    |                    |
| fcc               | 1812.5               | 0               | 1                 | 0                 | -1.440             | 0.159               | -1.281               |                    |                      |                    |                    |
| hcp               | 1787.6               | 0               | 0                 | 1                 | -1.550             | 0.177               | -1.372               |                    |                      |                    |                    |
| Structure         | Slot<br>[Å²]         | N CO top<br>[-] | N CO fcc<br>[-]   | N CO hcp<br>[-]   | E b DFT<br>[eV/CO] | E b CORR<br>[eV/CO] | Slot / N CO*<br>[Å²] | E b MOD<br>[eV/CO] | Error MOD<br>[eV/Rh] | E f DFT<br>[eV/Rh] | E f MOD<br>[eV/Rh] |
| clean             | 6.465                | 0               | 0                 | 0                 |                    |                     |                      |                    |                      | 0.227              | 0.227              |
| 0.25 ML top       | 25.859               | 1               | 0                 | 0                 | -1.478             | -1.499              | 25.859               | -1.515             | 1.09%                | 0.164              | 0.164              |
| 0.75 ML top       | 25.859               | 1               | 1                 | 1                 | -1.292             | -1.187              | 8.620                | -1.281             | 7.90%                | 0.079              | 0.067              |
| 1.00 ML top       | 6.465                | 1               | 0                 | 0                 | -0.789             | -0.810              | 6.465                | -0.897             | 10.77%               | 0.092              | 0.077              |
| Rh(210)           |                      |                 |                   |                   |                    |                     |                      |                    |                      |                    |                    |
| site              | CO stretch<br>[1/cm] | N CO top<br>[-] | N CO fcc<br>[-]   | N CO hcp<br>[-]   | E b DFT<br>[eV]    | CORR<br>[eV]        | E b CORR<br>[eV]     |                    |                      |                    |                    |
| top               | 2052.2               | 1               | 0                 | 0                 | -1.562             | -0.024              | -1.585               |                    |                      |                    |                    |
| Structure         | Slot<br>[Å²]         | N CO top<br>[-] | N CO fcc<br>[-]   | N CO hcp<br>[-]   | E b DFT<br>[eV/CO] | E b CORR<br>[eV/CO] | Slot / N CO*<br>[Å²] | E b MOD<br>[eV/CO] | Error MOD<br>[eV/Rh] | E f DFT<br>[eV/Rh] | E f MOD<br>[eV/Rh] |
| clean             | 16.692               | 0               | 0                 | 0                 |                    |                     |                      |                    |                      | 0.320              | 0.344              |
| 0.25 ML top       | 66.767               | 1               | 0                 | 0                 | -1.562             | -1.585              | 66.767               | -1.626             | 2.56%                | 0.287              | 0.310              |
| 0.50 ML top       | 33.383               | 1               | 0                 | 0                 | -1.537             | -1.561              | 33.383               | -1.624             | 4.02%                | 0.255              | 0.276              |
| 1.00 ML top       | 16.692               | 1               | 0                 | 0                 | -1.493             | -1.517              | 16.692               | -1.599             | 5.44%                | 0.194              | 0.211              |
| Rh(211)           |                      |                 |                   |                   |                    |                     |                      |                    |                      |                    |                    |
| site              | CO stretch<br>[1/cm] | N CO top<br>[-] | N CO hcp<br>[-]   | N CO top 2<br>[-] | E b DFT<br>[eV]    | CORR<br>[eV]        | E b CORR<br>[eV]     |                    |                      |                    |                    |
| top               | 2022.8               | 1               | 0                 | 0                 | -1.574             | -0.001              | -1.575               |                    |                      |                    |                    |
| hcp               | 1728.1               | 0               | 1                 | 0                 | -1.492             | 0.223               | -1.269               |                    |                      |                    |                    |
| top 2             | 2048.5               | 0               | 0                 | 1                 | -1.387             | -0.021              | -1.408               |                    |                      |                    |                    |
| Structure         | Slot<br>[Å²]         | N CO top<br>[-] | N CO hcp<br>[-]   | N CO top2<br>[-]  | E b DFT<br>[eV/CO] | E b CORR<br>[eV/CO] | Slot / N CO*<br>[Å²] | E b MOD<br>[eV/CO] | Error MOD<br>[eV/Rh] | E f DFT<br>[eV/Rh] | E f MOD<br>[eV/Rh] |
| clean             | 18.285               | 0               | 0                 | 0                 |                    |                     |                      |                    |                      | 0.347              | 0.360              |
| 0.50 ML top       | 36.570               | 1               | 0                 | 0                 | -1.574             | -1.575              | 36.570               | -1.589             | 0.91%                | 0.281              | 0.294              |
| 1.00 ML mix       | 36.570               | 1               | 0                 | 1                 | -1.459             | -1.470              | 18.285               | -1.572             | 6.87%                | 0.224              | 0.229              |
| 2.00 ML mix       | 18.285               | 1               | 0                 | 1                 | -1.256             | -1.267              | 9.142                | -1.393             | 9.95%                | 0.136              | 0.128              |
| Rh(311)           |                      |                 |                   |                   |                    |                     |                      |                    |                      |                    |                    |
| site              | CO stretch<br>[1/cm] | N CO top<br>[-] | N CO brg<br>[-]   | N CO hcp<br>[-]   | E b DFT<br>[eV]    | CORR<br>[eV]        | E b CORR<br>[eV]     |                    |                      |                    |                    |
| top               | 2032.3               | 1               | 0                 | 0                 | -1.541             | -0.009              | -1.550               |                    |                      |                    |                    |
| brg               | 1893.6               | 0               | 1                 | 0                 | -1.661             | 0.097               | -1.564               |                    |                      |                    |                    |
| Structure         | Slot<br>[Å²]         | N CO top<br>[-] | N CO brg<br>[-]   | N CO hcp<br>[-]   | E b DFT<br>[eV/CO] | E b CORR<br>[eV/CO] | Slot / N CO*<br>[Å²] | E b MOD<br>[eV/CO] | Error MOD<br>[eV/Rh] | E f DFT<br>[eV/Rh] | E f MOD<br>[eV/Rh] |
| clean             | 12.379               | 0               | 0                 | 0                 |                    |                     |                      |                    |                      | 0.364              | 0.381              |
| 0.25 ML top       | 49.516               | 1               | 0                 | 0                 | -1.541             | -1.550              | 49.516               | -1.591             | 2.64%                | 0.315              | 0.331              |
| 0.50 ML top       | 49.516               | 2               | 0                 | 0                 | -1.543             | -1.551              | 24.758               | -1.584             | 2.12%                | 0.267              | 0.282              |
| 1.00 ML brg       | 24.758               | 0               | 2                 | 0                 | -1.626             | -1.529              | 12.379               | -1.519             | -0.65%               | 0.172              | 0.191              |
| Rh(321)           |                      |                 |                   |                   |                    |                     |                      |                    |                      |                    |                    |
| site              | CO stretch<br>[1/cm] | N CO top<br>[-] | N CO top 2<br>[-] | N CO brg<br>[-]   | E b ave<br>[eV]    | CORR<br>[eV]        | E b CORR<br>[eV]     |                    |                      |                    |                    |
| top               | 2050.1               | 1               | 0                 | 0                 | -1.590             | -0.022              | -1.612               |                    |                      |                    |                    |
| top 2             | 2030.6               | 0               | 1                 | 0                 | -1.564             | -0.007              | -1.572               |                    |                      |                    |                    |
| Structure         | Slot<br>[Å²]         | N CO top<br>[-] | N CO top 2<br>[-] | N CO hcp<br>[-]   | E b DFT<br>[eV/CO] | E b CORR<br>[eV/CO] | Slot / N CO*<br>[Å²] | E b MOD<br>[eV/CO] | Error MOD<br>[eV/Rh] | E f DFT<br>[eV/Rh] | E f MOD<br>[eV/Rh] |
| clean             | 27.931               | 0               | 0                 | 0                 |                    |                     |                      |                    |                      | 0.376              | 0.396              |
| 0.50 ML top       | 55.861               | 1               | 0                 | 0                 | -1.590             | -1.612              | 55.861               | -1.626             | 0.85%                | 0.331              | 0.351              |
| 1.00 ML top       | 27.931               | 1               | 0                 | 0                 | -1.575             | -1.597              | 27.931               | -1.621             | 1.51%                | 0.287              | 0.306              |
| 2.00 ML mix       | 27.931               | 1               | 1                 | 0                 | -1.494             | -1.508              | 13.965               | -1.578             | 4.61%                | 0.208              | 0.221              |
| Rh(331)           |                      |                 |                   |                   |                    |                     |                      |                    |                      |                    |                    |
| site              | CO stretch<br>[1/cm] | N CO top<br>[-] | N CO brg<br>[-]   | N CO top 2<br>[-] | E b DFT<br>[eV]    | CORR<br>[eV]        | E b CORR<br>[eV]     |                    |                      |                    |                    |
| top               | 2023.6               | 1               | 0                 | 0                 | -1.492             | -0.002              | -1.494               |                    |                      |                    |                    |
| Structure         | Slot<br>[Å²]         | N CO top<br>[-] | N CO brg<br>[-]   | N CO top 2<br>[-] | E b DFT<br>[eV/CO] | E b CORR<br>[eV/CO] | Slot / N CO*<br>[Å²] | E b MOD<br>[eV/CO] | Error MOD<br>[eV/Rh] | E f DFT<br>[eV/Rh] | E f MOD<br>[eV/Rh] |
| clean             | 16.269               | 0               | 0                 | 0                 |                    |                     |                      |                    |                      | 0.308              | 0.325              |
| 0.50 ML top       | 32.538               | 1               | 0                 | 0                 | -1.492             | -1.494              | 32.538               | -1.588             | 6.33%                | 0.245              | 0.258              |
| 1.00 ML top       | 32.538               | 2               | 0                 | 0                 | -1.457             | -1.459              | 16.269               | -1.562             | 7.10%                | 0.186              | 0.194              |
| 2.00 ML mix       | 16.269               | 2               | 0                 | 0                 | -1.178             | -1.180              | 8.135                | -1.300             | 10.17%               | 0.111              | 0.108              |

| nanoparticles |              |           |           |           |                    |                     |                     |                    |                      |                      |                    |                    |
|---------------|--------------|-----------|-----------|-----------|--------------------|---------------------|---------------------|--------------------|----------------------|----------------------|--------------------|--------------------|
| FCC 087       |              |           |           |           |                    |                     |                     |                    |                      |                      |                    |                    |
| Structure     | Area<br>[Å²] | N CO CN 3 | N CO CN 6 | N CO CN 7 | E b DFT<br>[eV/CO] | E b CORR<br>[eV/CO] | Slot / N CO*        | E b MOD<br>[eV/CO] | Error MOD<br>[eV/Rh] | E f DFT<br>[eV/Rh]   | E f MOD<br>[eV/Rh] |                    |
| 1.00 ML mix   | 524.867      | 8         | 24        | 12        | -1.448             | -1.498              | 11.929              | -1.554             | 3.72%                | 0.315                | 0.277              |                    |
| FCC 147       |              |           |           |           |                    |                     |                     |                    |                      |                      |                    |                    |
| Structure     | Area<br>[Å²] | N CO CN 5 | N CO CN 7 | N CO CN 8 | N CO CN 9          | E b DFT<br>[eV/CO]  | E b CORR<br>[eV/CO] | Slot / N CO*       | E b MOD<br>[eV/CO]   | Error MOD<br>[eV/Rh] | E f DFT<br>[eV/Rh] | E f MOD<br>[eV/Rh] |
| 1.00 ML       | 822.296      | 12        | 48        | 24        | 8                  | -1.433              | -1.423              | 8.938              | -1.372               | -3.56%               | -0.046             | -0.040             |
| CUB 147       |              |           |           |           |                    |                     |                     |                    |                      |                      |                    |                    |
| Structure     | Area<br>[Å²] | N CO CN 3 | N CO CN 5 | N CO CN 8 | E b DFT<br>[eV/CO] | E b CORR<br>[eV/CO] | Slot / N CO*        | E b MOD<br>[eV/CO] | Error MOD<br>[eV/Rh] | E f DFT<br>[eV/Rh]   | E f MOD<br>[eV/Rh] |                    |
| 1.00 ML       | 888.219      | 4         | 28        | 65        | -1.380             | -1.370              | 9.157               | -1.397             | 1.94%                | 0.041                | 0.027              |                    |

**Table S3:** Table of the data set of CO adsorption at high coverage on slabs and nanoparticles. For adsorption at a single site, in the table are reported: the frequencies of the CO stretching; the numbers of adsorbed CO\*; the binding energies calculated with DFT (E b DFT) and corrected with the formula proposed by Manson et al.<sup>3</sup> (E b CORR). Then, for the systems at high coverage are reported: the total surface of the system (S tot); the number of CO; the average binding energies calculated with DFT and corrected; the ratio between the surface area and the number of CO molecules (Stot / N CO\*); the binding energies calculated with the model proposed in the work (E b MOD); the percentage error; the formation energies of the system calculated with DFT (E f DFT) and with the model (E f MOD).

### Section 3: Identification of active sites and calculation of reaction rates of CO\* dissociation.

An example of catalytic sites grid is reported in Figure S10. The binding sites recognized are: top, bridge, (100)-hollow, (110)-long bridge, (110)-long hollow, (111)-fcc, (111)-hcp, (311)-step and (210)-step.

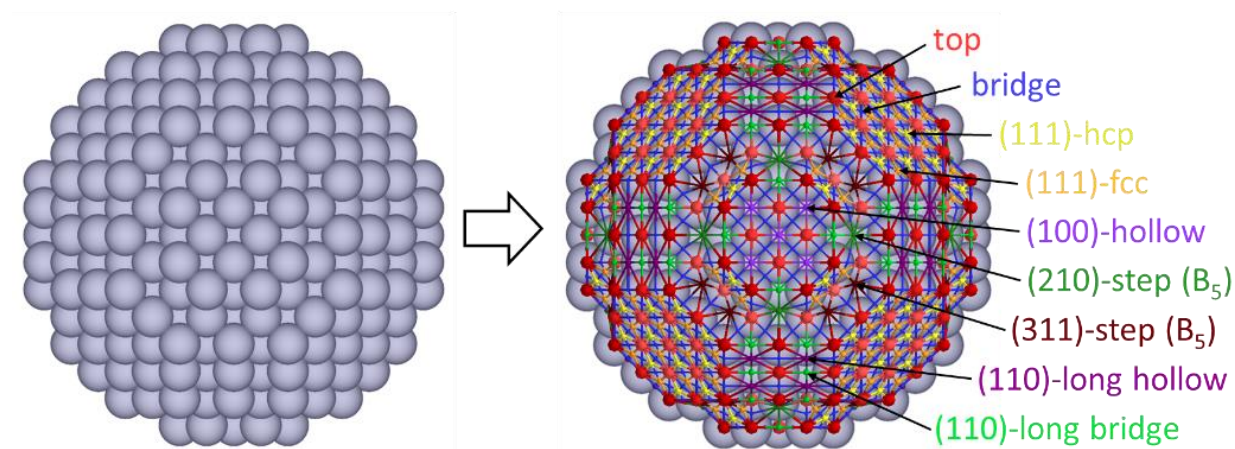

**Figure S10:** Binding sites grid of one sample nanoparticle. The binding sites recognized are: top (red), bridge (blue), (100)-hollow (violet), (110)-long bridge (green), (110)-long hollow (purple), (111)-fcc (orange), (111)-hcp (yellow), (311)-step (brown) and (210)-step (dark green). Top sites are also differentiated by their coordination number: they are darker with the decrease of their coordination number.

We simulate the reaction path of CO\* dissociation on 6 crystal facets of Rh. The geometry of initial, final and transition states are reported in Figure S11. Within harmonic transition state theory, we calculate the Gibbs activation energies of the elementary step on the six facets. The resulting values are reported in Table S1. For the different facets, the transition state is found in correspondence of different active sites. The activation Gibbs free energy for CO\* dissociation is affected mostly by the geometry (type) of active site. For the case of B<sub>5</sub> sites, we analyzed the CO\* dissociation on three Rh crystal facets with different coordination environments. On Rh(211), the B<sub>5</sub> site is provided by two atoms with CN<sub>10</sub>, two with CN<sub>7</sub>

and one with CN<sub>9</sub>. On Rh(311), the B<sub>5</sub> site is provided by two CN<sub>10</sub> and three CN<sub>7</sub>. On Rh(210), the B<sub>5</sub> site is provided by two CN<sub>6</sub>, two CN<sub>9</sub> and one CN<sub>11</sub>. As reported in Table S4, the Gibbs activation energies on the three facets which show B<sub>5</sub> sites are similar, and they are significantly lower than the Gibbs activation energies on the other Rh crystal facets.

**Table S4.** Gibbs activation energies of the CO\* dissociation elementary step on six facets of Rh.

| facet | Rh(100) | Rh(110) | Rh(111) | Rh(211)        | Rh(311)        | Rh(210)        |
|-------|---------|---------|---------|----------------|----------------|----------------|
| site  | hol     | lho     | fcc     | B <sub>5</sub> | B <sub>5</sub> | B <sub>5</sub> |
| Gact  | 2.204   | 2.642   | 3.117   | 1.685          | 1.812          | 1.775          |

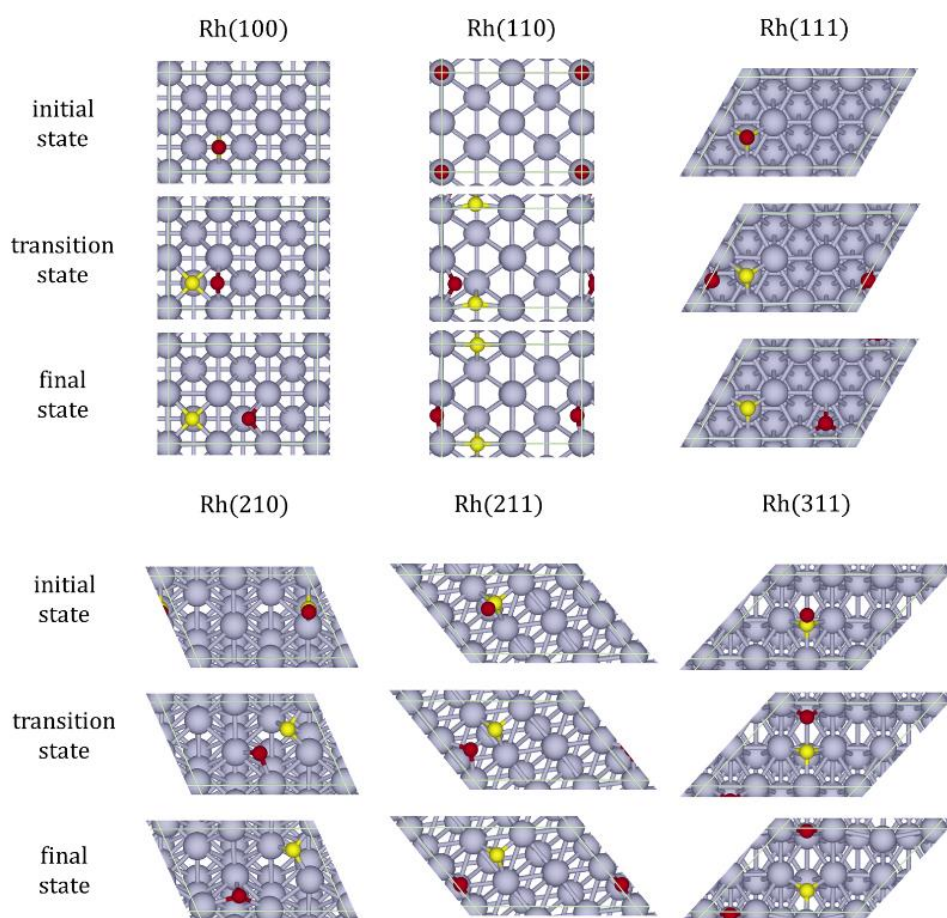

**Figure S11:** Geometry of initial states, final states and transition states of CO dissociation elementary step on the six surfaces of Rh: (100), (110), (111), (210), (211) and (311).

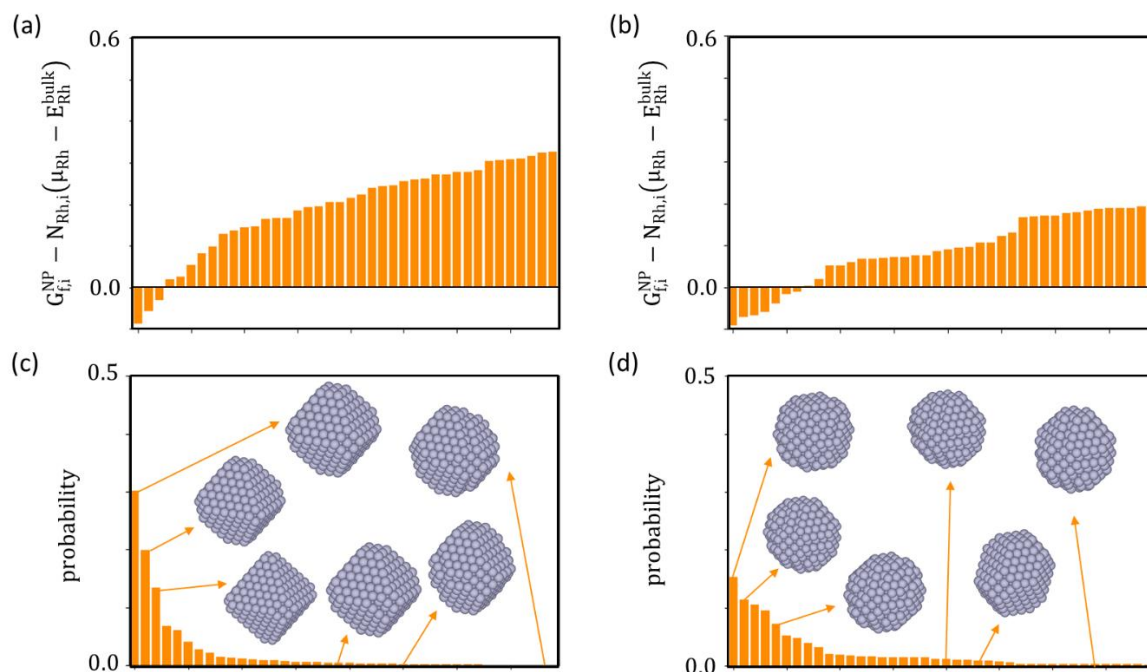

**Figure S12:** Gibbs formation energies relative to the Rh chemical potential in the system ( $\mu_{\text{Rh}}$ ) of the 40 most stable nanoparticles in the ensemble for  $P_{\text{CO}} = 10^{-3}$  (a) and  $10^{-1}$  atm (b). Nanoparticles' corresponding probability evaluated with a Boltzmann distribution for  $P_{\text{CO}} = 10^{-3}$  (c) and  $10^{-1}$  atm (d). Examples of nanoparticles with relevant probabilities are represented as insets in the figures.

#### References:

- (1) Sun, C. Q.; Tay, B. K.; Zeng, X. T.; Li, S.; Chen, T. P.; Zhou, J.; Bai, H. L.; Jiang, E. Y. Bond-Order-Bond-Length-Bond-Strength (Bond-OLS) Correlation Mechanism for the Shape-and-Size Dependence of a Nanosolid. *J. Phys. Condens. Matter* **2002**, 14 (34), 7781–7795. <https://doi.org/10.1088/0953-8984/14/34/301>.
- (2) Howie, A.; Marks, L. D. Elastic Strains and the Energy Balance for Multiply Twinned Particles. *Philos. Mag. A Phys. Condens. Matter, Struct. Defects Mech. Prop.* **1984**, 49 (1), 95–109. <https://doi.org/10.1080/01418618408233432>.
- (3) Mason, S. E.; Grinberg, I.; Rappe, A. M. First-Principles Extrapolation Method for Accurate CO Adsorption Energies on Metal Surfaces. *Phys. Rev. B - Condens. Matter Mater. Phys.* **2004**, 69 (16), 1–4. <https://doi.org/10.1103/PhysRevB.69.161401>.
- (4) Sprowl, L. H.; Campbell, C. T.; Árnadóttir, L. Hindered Translator and Hindered Rotor Models for Adsorbates: Partition Functions and Entropies. *J. Phys. Chem. C* **2016**, 120 (18), 9719–9731. <https://doi.org/10.1021/acs.jpcc.5b11616>.
- (5) McBride, B.; Gordon, S.; Reno, M. Coefficients for Calculating Thermodynamic and Transport Properties of Individual Species. *Nasa Tech. Memo.* **1993**, 4513 (NASA-TM-4513), 98.
